# Supplementary material for: Life-course partnership history and midlife health behaviours in a population-based birth cohort
Source: PubMed Central journal article supplement — J Epidemiol Community Health. 2016 Sep 21;71(3):232–8. doi: 10.1136/jech-2015-207051 (PMC5318654; doi:10.1136/jech-2015-207051), 2016-09-21
Supplement: jech-2015-207051supp_tables.pdf [file jech-2015-207051supp_tables.pdf]

## Appendix Tables

**Table 1: Distribution of married and non-marital cohabitation status in 1981, 1991, 2000 and 2002-04.**

|                              | <b>Married</b>   |                    | <b>Cohabiting</b> |                    |
|------------------------------|------------------|--------------------|-------------------|--------------------|
|                              | <b>Men N (%)</b> | <b>Women N (%)</b> | <b>Men N(% )</b>  | <b>Women N(% )</b> |
| <b>1981 (23 years)</b>       | 2179 (34.8)      | 3409 (54.4)        | 338 (5.4)         | 451 (7.2)          |
| <b>1991 (33 years)</b>       | 3701 (69.0)      | 4063 (72.1)        | 579 (10.8)        | 541 (9.6)          |
| <b>2000 (42 years)</b>       | 3946 (70.6)      | 4095 (71.1)        | 533 (9.5)         | 514 (8.9)          |
| <b>2002-04 (44-46 years)</b> | 3303 (70.8)      | 3262 (69.2)        | 569 (12.2)        | 570 (12.1)         |
|                              |                  |                    |                   |                    |
| <b>Remarried by 42</b>       | 517 (9.2)        | 655 (11.3)         |                   |                    |

**Table 2: Descriptive statistics of all covariates included in the models (Men) (N=4970)**

|                                |                | N    | %    |                                   |                          | N     | %    |
|--------------------------------|----------------|------|------|-----------------------------------|--------------------------|-------|------|
| Financial hardship at 11       | Yes            | 372  | 9    | Parental divorce at 16            | Yes                      | 145   | 3.2  |
|                                | No             | 3771 | 91   |                                   | No                       | 4378  | 96.8 |
|                                | missing        | 827  |      |                                   | missing                  | 447   |      |
| Paternal social class at 7     | i              | 261  | 6.2  | Smoking at 16                     | Never smoked             | 2443  | 64.7 |
|                                | ii             | 675  | 16   |                                   | 0-29 cigarettes per week | 605   | 16.0 |
|                                | iii non-manual | 436  | 10.3 |                                   | 30+ cigarettes per week  | 731   | 19.3 |
|                                | iii manual     | 1904 | 45   |                                   | missing                  | 1191  |      |
|                                | iv non-manual  | 81   | 1.9  | Depression at 23                  | Not depressed            | 4259  | 96.5 |
|                                | iv manual      | 647  | 15.3 |                                   | Depressed                | 153   | 3.5  |
|                                | v              | 226  | 5.3  |                                   | missing                  | 558   |      |
|                                | missing        | 740  |      | Long standing illness at 23       | Yes                      | 205   | 4.6  |
| Housing tenure at 7            | Owner          | 1936 | 44.6 |                                   | No                       | 4216  | 95.4 |
|                                | Other          | 2402 | 55.4 |                                   | missing                  | 549   |      |
|                                | missing        | 632  |      | Self-rated health at 23           | excellent                | 2155  | 48.8 |
| Paternal weekly net pay at 16  | 0-`4           | 6    | 0.3  |                                   | good                     | 1916  | 43.3 |
|                                | `5-`9          | 6    | 0.3  |                                   | fair                     | 321   | 7.3  |
|                                | `10-`14`       | 15   | 0.8  |                                   | poor                     | 28    | 0.6  |
|                                | `15-`19        | 56   | 2.9  |                                   | missing                  | 550   |      |
|                                | `20-`24        | 242  | 12.4 | Unemployed at 23                  | Yes                      | 410   | 21.0 |
|                                | `25-`29        | 482  | 24.7 |                                   | No                       | 1527  | 78.3 |
|                                | `30-`34        | 468  | 24   |                                   | missing                  | 3033  |      |
|                                | `35-`39        | 290  | 14.9 | Housing tenure at 23              | Owner                    | 1071  | 52.0 |
|                                | `40-`44        | 175  | 9    |                                   | Other                    | 979   | 48.0 |
|                                | `45-`49        | 83   | 4.3  |                                   | missing                  | 2920  |      |
|                                | `50-`59        | 69   | 3.5  | Smoking at 23                     | Never smoked             | 1297  | 28.8 |
|                                | `60 plus       | 60   | 3.1  |                                   | Ex-occasional smoker     | 1440  | 32.0 |
|                                | missing        | 3018 |      |                                   | Current smoker           | 1760  | 39.2 |
| Access to household amenities  | sole use of    | 3628 | 83.9 |                                   | missing                  | 473   |      |
|                                | sole use of    | 263  | 6.1  | Drinking frequency at 23          | Never drinks             | 131   | 2.9  |
|                                | sole use of    | 202  | 4.7  |                                   | Special occasions only   | 271   | 6.0  |
|                                | shared no      | 233  | 5.4  |                                   | Less than weekly         | 398   | 8.9  |
|                                | missing        | 644  |      |                                   | 1-2 times per week       | 2251  | 50.1 |
| Education at 23                | no qualific    | 463  | 11   |                                   | Most days                | 1443  | 32.1 |
|                                | cse 2-5/eq     | 493  | 11.7 |                                   | missing                  | 476   |      |
|                                | O level/eq     | 1428 | 34   | Physical activity frequency at 23 | 5+ times per week        | 405   | 9.0  |
|                                | A level/eq     | 991  | 23.6 |                                   | 3-4 times per week       | 530   | 11.8 |
|                                | high qual/r    | 393  | 9.3  |                                   | 1-2 times per week       | 968   | 21.6 |
|                                | degree/hig     | 437  | 10.4 |                                   | 2-3 times last 4 weeks   | 500   | 11.1 |
|                                | missing        | 765  |      |                                   | once last 4 weeks        | 318   | 7.1  |
| Social class at 23             | manual         | 2125 | 61   |                                   | None last 4 weeks        | 1,770 | 39.4 |
|                                | non-manu       | 1367 | 39   |                                   | missing                  | 479   |      |
|                                | missing        | 1478 |      | Partnership trajectory            | Class 1                  | 3073  | 16.6 |
| Health centre attendance at 16 | no             | 1404 | 38.8 |                                   | Class 2                  | 411   | 2.2  |
|                                | yes, once      | 990  | 27.4 |                                   | Class 3                  | 372   | 2.0  |
|                                | yes, twice     | 576  | 15.9 |                                   | Class 4                  | 467   | 2.5  |
|                                | yes, 3 time    | 268  | 7.4  |                                   | Class 5                  | 94    | 0.5  |
|                                | yes, 4 time    | 125  | 3.5  |                                   | Class 6                  | 553   | 3.0  |
|                                | yes, 5+ tim    | 194  | 5.4  |                                   | missing                  | 0     |      |
|                                | yes, don't l   | 58   | 1.6  |                                   | N                        | Mean  | SD   |
|                                | missing        | 1355 |      | Height at 7                       | 4118                     | 1.2   | 0.0  |
| Disability at 16               | Yes            | 260  | 7.4  | Behaviour score at 16             | 3679                     | 3.8   | 3.7  |
|                                | No             | 3234 | 92.6 | Cognitive ability at 11           | 4271                     | 44.2  | 15.6 |
|                                | missing        | 1476 |      | Height at 23                      | 4398                     | 1.8   | 0.1  |
|                                |                |      |      | BMI at 23                         | 4418                     | 23.0  | 2.8  |
|                                |                |      |      | Net household income at 23        | 4498                     | 7.1   | 3.4  |

**Table 3: Descriptive statistics of all covariates included in the models (Women) (N=5256)**

|                            |              | N    | %           |                             |                         | N           | %    |      |
|----------------------------|--------------|------|-------------|-----------------------------|-------------------------|-------------|------|------|
| Financial hardship at 11   | Yes          | 455  | 10.4        | Parental divorce at 16      | Yes                     | 191         | 4.0  |      |
|                            | No           | 3935 | 89.6        |                             | No                      | 4597        | 96.0 |      |
|                            | missing      | 866  |             |                             | missing                 | 468         |      |      |
| Paternal social class at 7 | i            | 259  | 5.8         | Smoking at 16               | Never smo               | 2710        | 66.5 |      |
|                            | ii           | 703  | 15.6        |                             | 0-29 cigare             | 830         | 20.4 |      |
|                            | iii non-man  | 481  | 10.7        |                             | 30+ cigare              | 533         | 13.1 |      |
|                            | iii manual   | 2021 | 44.8        |                             | missing                 | 1183        |      |      |
|                            | iv non-man   | 80   | 1.8         | Depression at 23            | Not depre               | 4255        | 89.9 |      |
|                            | iv manual    | 712  | 15.8        |                             | Depressed               | 476         | 10.1 |      |
|                            | v            | 260  | 5.8         |                             | missing                 | 525         |      |      |
|                            | missing      | 740  |             | Long standing illness at 23 | Yes                     | 183         | 3.8  |      |
| Housing tenure at 7        | Owner        | 2022 | 43.6        |                             | No                      | 4560        | 96.2 |      |
|                            | Other        | 2619 | 56.4        |                             | missing                 | 513         |      |      |
|                            | missing      | 615  |             | Self-rated health at 23     | excellent               | 2009        | 42.4 |      |
| Paternal weekly net pay a  | 0-`4         | 3    | 0.1         |                             | good                    | 2276        | 48.0 |      |
|                            | `5-`9        | 3    | 0.1         |                             | fair                    | 419         | 8.8  |      |
|                            | `10-14`      | 14   | 0.7         | poor                        | 38                      | 0.8         |      |      |
|                            | `15-`19      | 53   | 2.6         | missing                     | 514                     |             |      |      |
|                            | `20-`24      | 280  | 13.7        | Unemployed at 23            | Yes                     | 279         | 14.4 |      |
|                            | `25-`29      | 486  | 23.8        |                             | No                      | 1649        | 84.9 |      |
|                            | `30-`34      | 491  | 24.0        |                             | missing                 | 3328        |      |      |
|                            | `35-`39      | 273  | 13.4        | Housing tenure at 23        | Owner                   | 1844        | 55.0 |      |
|                            | `40-`44      | 212  | 10.4        |                             | Other                   | 1454        | 45.0 |      |
|                            | `45-`49      | 94   | 4.6         |                             | missing                 | 1958        |      |      |
|                            | `50-`59      | 60   | 2.9         | Smoking at 23               | Never smo               | 1625        | 33.7 |      |
|                            | `60 plus     | 75   | 3.7         |                             | Ex-occasio              | 1319        | 27.4 |      |
|                            | missing      | 3212 |             |                             | Current sm              | 1878        | 39.0 |      |
| Access to household ame    | sole use of  | 3811 | 82.7        |                             | missing                 | 434         |      |      |
|                            | sole use of  | 283  | 6.1         | Drinking frequency at 23    | Never drin              | 266         | 5.5  |      |
|                            | sole use of  | 246  | 5.3         |                             | Special occ             | 1044        | 21.6 |      |
|                            | shared no    | 267  | 5.8         |                             |                         | Less than v | 803  | 16.7 |
|                            | missing      | 649  |             |                             | 1-2 times p             | 2200        | 46.1 |      |
| Education at 23            | no qualific  | 601  | 13.1        |                             | Most days               | 488         | 10.1 |      |
|                            | cse 2-5/eq   | 680  | 14.8        |                             | missing                 | 455         |      |      |
|                            | O level/eq   | 1799 | 39.2        | Physical activity frequency | 5+ times p              | 170         | 3.5  |      |
| A level/eq                 | 570          | 12.4 | 3-4 times p |                             | 191                     | 4.0         |      |      |
|                            | high qual/r  | 525  | 11.4        |                             | 1-2 times p             | 724         | 15.0 |      |
|                            | degree/hig   | 416  | 9.1         |                             | 2-3 times l             | 405         | 8.4  |      |
|                            | missing      | 665  |             |                             | once last 4             | 307         | 6.4  |      |
| Social class at 23         | manual       | 1072 | 27.9        |                             | None last 4             | 3,024       | 62.7 |      |
|                            | non-manu     | 2776 | 72.1        |                             | missing                 | 435         |      |      |
|                            | missing      | 1408 |             | Partnership trajectory      | Class 1                 | 2209        | 11.9 |      |
| Health centre attendance   | no           | 1166 | 30.4        |                             | Class 2                 | 1215        | 6.6  |      |
|                            | yes, once    | 978  | 25.6        |                             | Class 3                 | 429         | 2.3  |      |
|                            | yes, twice   | 659  | 17.2        | Class 4                     | 294                     | 1.6         |      |      |
|                            | yes, 3 time  | 346  | 9.0         | Class 5                     | 457                     | 2.5         |      |      |
|                            | yes, 4 time  | 206  | 5.4         | Class 6                     | 652                     | 3.5         |      |      |
|                            | yes, 5+ tim  | 402  | 10.5        | missing                     | 0                       |             |      |      |
|                            | yes, don't l | 73   | 1.9         | N                           | Mean                    | SD          |      |      |
|                            | missing      | 1426 |             | Height at 7                 | 4362                    | 1.2         | 0.1  |      |
| Disability at 16           | Yes          | 206  | 5.5         |                             | Behaviour score at 16   | 3901        | 4    | 3.5  |
|                            | No           | 3536 | 94.5        |                             | Cognitive ability at 11 | 4547        | 46.3 | 15.1 |
|                            | missing      | 1514 |             | BMI at 23                   | 4748                    | 22.2        | 3.2  |      |
|                            |              |      |             | Net household income at 2   | 4822                    | 7.2         | 3.5  |      |

**Table 4: Estimated multinomial logistic relative risk ratios and 95% confidence intervals for classes of partnership trajectories ages 23-45, according to health behaviours at age 23**

|                                                 | <b>Partnership trajectory age 23-45 (latent classes)</b> |                                   |                                   |                                   |                                   |
|-------------------------------------------------|----------------------------------------------------------|-----------------------------------|-----------------------------------|-----------------------------------|-----------------------------------|
|                                                 | <b>Class 2<br/>(ref: Class 1)</b>                        | <b>Class 3<br/>(ref: Class 1)</b> | <b>Class 4<br/>(ref: Class 1)</b> | <b>Class 5<br/>(ref: Class 1)</b> | <b>Class 6<br/>(ref: Class 1)</b> |
| <b>Health behaviours at age 23</b>              | RRR (95 % CI)                                            | RRR (95 % CI)                     | RRR (95 % CI)                     | RRR (95 % CI)                     | RRR (95 % CI)                     |
| <b>MEN (N=4,970)</b>                            |                                                          |                                   |                                   |                                   |                                   |
| Drinking frequency at age 23 (ordinal)          | 0.92 (0.84-1.00)                                         | <b>1.32 (1.18-1.48)</b>           | <b>1.11 (1.00-1.21)</b>           | <b>0.84 (0.72-0.98)</b>           | 0.96 (0.89-1.04)                  |
| Smoking at age 23 (ordinal)                     | <b>1.21 (1.07-1.34)</b>                                  | <b>1.19 (1.05-1.34)</b>           | 0.99 (0.89-1.09)                  | 0.90 (0.73-1.12)                  | <b>0.79 (0.72-0.87)</b>           |
| Physical activity frequency at age 23 (ordinal) | 1.04 (0.99-1.10)                                         | 1.03 (0.97-1.09)                  | <b>0.92 (0.87-0.96)</b>           | 0.95 (0.86-1.05)                  | <b>1.09 (1.04-1.14)</b>           |
| BMI at age 23 (continuous)                      | <b>0.96 (0.93-0.99)</b>                                  | 0.97 (0.93-1.00)                  | 0.99 (0.96-1.01)                  | 0.95 (0.89-1.02)                  | 0.98 (0.95-1.01)                  |
| <b>WOMEN (N=5,256)</b>                          |                                                          |                                   |                                   |                                   |                                   |
| Drinking frequency at age 23 (ordinal)          | <b>1.41(1.32-1.51)</b>                                   | <b>1.23 (1.12-1.34)</b>           | 1.09 (0.98-1.20)                  | 0.99 (0.91-1.07)                  | 1.05 (0.98-1.12)                  |
| Smoking at age 23 (ordinal)                     | 0.98 (0.92-1.06)                                         | <b>1.53( 1.37-1.71)</b>           | 1.07 (0.94-1.22)                  | <b>1.17 (1.05-1.30)</b>           | 0.98 (0.90-1.08)                  |
| Physical activity frequency at age 23 (ordinal) | <b>0.85 (0.82-0.89)</b>                                  | 0.95 (0.89-1.00)                  | 0.96 (0.89-1.03)                  | <b>1.11 (1.04-1.19)</b>           | 0.96 (0.91-1.00)                  |
| BMI at age 23 (continuous)                      | <b>0.95 (0.94-0.98)</b>                                  | 0.98 (0.95-1.01)                  | 0.99 (0.96-1.02)                  | 0.98 (0.95-1.00)                  | 1.02 (1.00-1.05)                  |

### Notes

Drinking frequency (age 23) self reported as ‘never drinks/special occasions only/less than weekly/1-2 times per week/most days’. Smoking at age 23 self reported as never smoked/ex-occasional smoker/current smoker. Physical activity at age 23 self reported as 5+ times per week //3-4 times per week /1-2 times per week /2-3 times in last 4 weeks / once in last 4 weeks /none in last 4 weeks

Men, Class 1= Married in 20's/early 30's, married once Class 2= Divorced at late 30's not remarried Class 3= Cohabiting, not married Class 4= Married in mid/late 30's, married once Class 5= Divorced in 30's, later remarried Class 6= Never married or cohabited

Women, Class 1: Married in early 20's, married once, Class 2: Married in late 20's/early 30's, married once, Class 3: Cohabiting, not married, Class 4:Divorced in 20's/early 30's, cohabited or remarried, Class 5: Divorced in mid/late 30's, not remarried, Class 6: Never married or cohabited

Adjusted for early life socio-economic position (latent summary of financial hardship during the last year at age 11, access to household amenities at age 11, paternal social class at age 7, number of people per room at birth, housing tenure at age 7 and paternal weekly net pay at age 16), health centre attendance during the last year at age 16, disability at age 16, height at age 7, cognitive ability at 11, parental divorce at age 16, behaviour score (age 16)

Results in bold font are statistically significant at the 5% level.
